# Supplementary material
Source: PubMed Central journal article supplement (PMC3761312)
Supplement: 2b7a0e224552a5e4d30b648528c49a70_genetics.113.152231-5.pdf [file 2b7a0e224552a5e4d30b648528c49a70_genetics.113.152231-5.pdf]

**Table S1 Effects of sub-lethal Hydroxyurea concentration in AmutBmut strain**

|                                                 | Control  | 0.25 mM HU |
|-------------------------------------------------|----------|------------|
| Speed of growth <sup>1</sup>                    | 6 days   | 6 days     |
| Ability to produce fruiting bodies <sup>2</sup> | +        | +          |
| Proportion of abnormal mitosis (%) <sup>3</sup> | 11.5±1.0 | 4.2±0.6    |

<sup>1</sup>. The ability to grow was measured as the time required to cover a Petri dish for a mycelium cylinder of 0.2 cm of radius that was inoculated in the center of 9 cm diameter YMG/T plates.

<sup>2</sup>. 3 plates of YMG/T in each condition were inoculated and incubated in environmental conditions that favored the formation of fruiting bodies. After one week the presence of fruiting bodies was analyzed. In both cases, control and HU conditions, we were able to observe the production of fruiting bodies. No apparent delay in fruiting body production was observed in the HU condition.

<sup>3</sup>. Abnormal mitosis were quantified as in Fig. 2
