# Supplementary material
Source: PubMed Central journal article supplement (PMC3761312)
Supplement: cd9fe668cd262af0d4467ec8f89dd55f_genetics.113.152231-3.pdf [file cd9fe668cd262af0d4467ec8f89dd55f_genetics.113.152231-3.pdf]

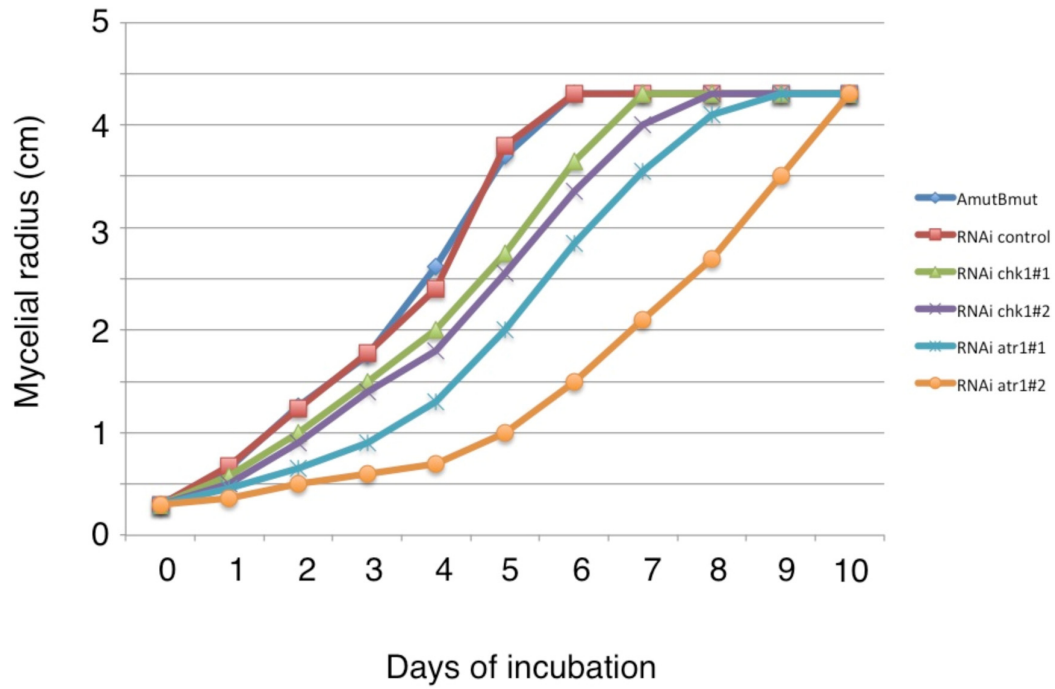

**Figure S3** Growth of silenced strains on plate. Mycelium cylinders of 0.2 cm of radius of each indicated strain were inoculated in the center of 9 cm diameter YMG/T plates and the radius of the colony was daily measured.
